# Supplementary material
Source: publisher figshare collection journal article supplement (https://tandf.figshare.com/articles/dataset/_/9109403)
Supplement: Supplementary file 1 [file 1]

## Porphyry Cu fertility of the Loch Lilly-Kars Belt, western New South Wales, Australia

B. Baatar<sup>a,b</sup>, L. A. Parra-Avila<sup>a,b\*</sup>, M. L. Fiorentini<sup>a,b</sup>, P. Polito<sup>c</sup> and A. J. Crawford<sup>d</sup>

<sup>a</sup> Centre for Exploration Targeting, School of Earth Sciences, The University of Western Australia, M006, 35 Stirling Highway, Perth, WA 6009, Australia; <sup>b</sup> ARC Centre of Excellence for Core to Crust Fluid Systems, Department of Earth and Planetary Sciences Macquarie University, NSW 2109, Australia; <sup>c</sup> San Antonio Exploration, PO BOX 2082, Churchlands, WA 6018, Australia; <sup>d</sup> Centre for Ore Deposits and Earth Sciences (CODES), University of Tasmania, Private Bag 79, Hobart Tasmania 7001, Australia.

\*Corresponding author: [luis.parraavila@uwa.edu.au](mailto:luis.parraavila@uwa.edu.au)

Received 27 February 2018; accepted 6 June 2019

L. A. Parra-Avila <https://orcid.org/0000-0001-6278-6596>

M. L. Fiorentini <https://orcid.org/0000-0001-8079-9606>

### SUPPLEMENTARY PAPERS

*Australian Journal of Earth Sciences* (2020) 67, <https://doi.org/10.1080/08120099.2019.1637937>

Copies of Supplementary Papers may be obtained from the Geological Society of Australia's website ([www.gsa.org.au](http://www.gsa.org.au)), the Australian Journal of Earth Sciences website ([www.ajes.com.au](http://www.ajes.com.au)) or from the National Library of Australia's Pandora archive (<https://pandora.nla.gov.au/tep/150555>).

---

### Supplementary papers

Table S1. Summary of U–Pb measurements for Cambrian and Devonian samples from the Loch Lilly-Kars Belt. Data include standards as well as rejected analyses. (Excel file)

Table S2. *In-situ* trace-element data compile from samples AU101934, AUR101946, AUR101955 and AUR101988, including GJ, 91500 and TEM2 zircon standard measurements. (Excel file)

Table S3. Oxygen isotope collected data, for samples AUR101934, AUR101946 and AUR101955. Data include Penglai and TEM2 zircon standards. (Excel file)

Table S4. Whole-rock geochemical characterisation. (Excel file)
