# Supplementary material
Source: publisher figshare collection journal article supplement (https://tandf.figshare.com/articles/dataset/_/9109403)
Supplement: Supplementary file 2 [file 1 › taje_a_1637937_sm8133.xlsx]

## Sheet: Table S1
Baatar et al. (2020). Australian Journal of Earth Sciences, 67, https://doi.org/10.1080/08120099.2019.1637937
Table S1. Summary of U–Pb measurements for Cambrian and Devonian samples from the Loch Lilly-Kars Belt. Data include standards as well as rejected analyses.
	U-Th-Pb ratios									Ages (Ma)
Grain spot	207/206	207/206 2𝛔 (abs)	207/235	207/235 2𝛔 (abs)	206/238	206/238 2𝛔 (abs)	208/232	208/232 2𝛔 (abs)		207/206	± 2𝛔	207/235	± 2𝛔	206/238	± 2𝛔
91500-01	0.0760155	0.00073837	1.67775	0.015521	0.160089	0.0009171	0.051594	0.00073859		1095.5	19.32	1000.1	5.89	957.3	5.1
91500-02	0.0750901	0.00086163	1.6403	0.0178693	0.158449	0.00096677	0.0489343	0.0009411		1070.9	22.88	985.8	6.87	948.2	5.38
91500-02	0.0752869	0.00068324	1.64623	0.0142323	0.158601	0.00089149	0.048924	0.00056809		1076.2	18.11	988.1	5.46	949	4.96
91500-03	0.0744104	0.00084839	1.71886	0.0185452	0.16755	0.00101345	0.0516118	0.00094106		1052.6	22.8	1015.6	6.93	998.6	5.6
91500-03	0.0758822	0.0007717	1.89245	0.019152	0.177801	0.00107683	0.0538841	0.00080115		1092	20.24	1078.4	6.72	1054.9	5.89
91500-04	0.0715624	0.00082174	1.56322	0.021231	0.162621	0.00106124	0.0490138	0.00069912		973.5	23.24	955.7	8.41	971.3	5.88
91500-05	0.0742168	0.00087703	1.74203	0.0257633	0.17332	0.00119934	0.0525182	0.00080442		1047.4	23.65	1024.2	9.54	1030.4	6.59
91500-05	0.0761743	0.00071011	1.97224	0.0178484	0.187802	0.00110966	0.0568015	0.0007069		1099.7	18.54	1106.1	6.1	1109.5	6.02
91500-06	0.0741135	0.00082057	1.8406	0.0191959	0.180156	0.001082	0.0548138	0.00091717		1044.6	22.17	1060.1	6.86	1067.8	5.91
91500-06	0.0741982	0.00068298	1.83007	0.0160644	0.178919	0.00100964	0.0543708	0.00062996		1046.9	18.45	1056.3	5.76	1061.1	5.52
91500-07	0.0761825	0.00083486	1.8215	0.0190703	0.173429	0.00106004	0.0525946	0.00088816		1099.9	21.77	1053.2	6.86	1031	5.82
STDGJ-03	0.0601375	0.00056329	0.808447	0.00724244	0.0975078	0.00054081	0.0306675	0.00054318		608.5	20.12	601.6	4.07	599.8	3.18
STDGJ-05	0.0599939	0.00068164	0.81429	0.00880418	0.0984518	0.00058767	0.030952	0.0006881		603.4	24.4	604.9	4.93	605.3	3.45
STDGJ-05	0.0600878	0.00051157	0.813388	0.00662092	0.0981871	0.00052799	0.0309088	0.00046223		606.7	18.31	604.4	3.71	603.8	3.1
STDGJ-06	0.0602538	0.00070213	0.805354	0.00892335	0.0969506	0.00058455	0.0305681	0.00069708		612.7	24.98	599.8	5.02	596.5	3.44
STDGJ-06	0.0602258	0.00051556	0.803744	0.0065737	0.0968008	0.00052106	0.0305102	0.00046356		611.7	18.39	598.9	3.7	595.6	3.06
STDGJ-08	0.0601318	0.00067158	0.809668	0.00857404	0.0976648	0.00057408	0.0307558	0.00065961		608.3	23.96	602.3	4.81	600.7	3.37
STDGJ-08	0.0600396	0.00056687	0.810184	0.00727223	0.0978651	0.00053974	0.0307416	0.00053233		605	20.29	602.6	4.08	601.9	3.17
STDGJ-09	0.0600665	0.00064261	0.822911	0.00685215	0.0997194	0.00043667	0.0310559	0.00040442		606	22.97	609.7	3.82	612.8	2.56
STDGJ-09	0.0587521	0.00061851	0.754066	0.00711883	0.0927081	0.00043174	0.0291706	0.00029635		557.9	22.79	570.6	4.12	571.5	2.55
STDGJ-10	0.0601122	0.00065437	0.797129	0.00667205	0.0958784	0.00041853	0.0304713	0.00040101		607.6	23.37	595.2	3.77	590.2	2.46
STDGJ-10	0.0611598	0.00064793	0.795757	0.00759223	0.0946059	0.00045019	0.030724	0.00031401		644.9	22.6	594.4	4.29	582.7	2.65
STDGJ-13	0.0595056	0.00063066	0.804221	0.0080262	0.0980392	0.00056616	0.0309807	0.00060425		585.6	22.84	599.2	4.52	602.9	3.32
STDGJ-13	0.059569	0.00051011	0.802606	0.00657681	0.0977373	0.00052661	0.0308352	0.00046224		588	18.47	598.3	3.7	601.1	3.09
STDGJ-14	0.0607925	0.00065681	0.815288	0.00827127	0.0972834	0.00056546	0.0305541	0.0006118		631.9	23.1	605.4	4.63	598.5	3.32
STDGJ-14	0.0609115	0.00052076	0.81533	0.0066686	0.0970978	0.0005238	0.0305627	0.00046167		636.1	18.29	605.4	3.73	597.4	3.08
STDGJ-15	0.0599995	0.00060673	0.813135	0.00786942	0.0983035	0.0005632	0.0308985	0.00058781		603.6	21.73	604.2	4.41	604.5	3.31
STDGJ-16	0.0602384	0.00062215	0.80479	0.00795739	0.0969066	0.00056081	0.0306067	0.0005984		612.1	22.16	599.5	4.48	596.3	3.3
STDGJ-11	0.0593769	0.0007724	0.756842	0.0127798	0.0930253	0.00069025	0.0292753	0.00065034		580.9	28.01	572.2	7.39	573.4	4.07
STDGJ-11	0.0601984	0.00052757	0.832021	0.00710269	0.100256	0.00056678	0.0312379	0.0004908		610.7	18.83	614.7	3.94	615.9	3.32
STDGJ-12	0.0608171	0.00096172	0.839047	0.0197366	0.0993189	0.00092086	0.0315289	0.00083514		632.8	33.69	618.6	10.9	610.4	5.4
STDGJ-12	0.0602927	0.00064431	0.801833	0.00834576	0.0964715	0.00059518	0.0306301	0.00061643		614.1	22.92	597.9	4.7	593.7	3.5
TEM-01	0.0630554	0.00137574	0.540952	0.0112378	0.0622263	0.00055217	0.0221776	0.00060808		710.1	45.72	439.1	7.4	389.2	3.35
TEM-02	0.0605266	0.00085995	0.525862	0.00711635	0.0630196	0.00042284	0.0231377	0.00051605		622.5	30.35	429.1	4.74	394	2.56
TEM-02	0.059501	0.00128564	0.540221	0.011085	0.0658521	0.00055931	0.022686	0.0005645		585.5	46.22	438.6	7.31	411.1	3.38
TEM-03	0.0582923	0.00112157	0.509425	0.00932291	0.0633886	0.00050658	0.0200346	0.00051173		540.1	42.19	418.1	6.27	396.2	3.07
TEM-03	0.0592074	0.00078077	0.612275	0.00825695	0.0720242	0.00049131	0.0221281	0.0003571		574.7	28.42	485	5.2	448.3	2.95
TEM-04	0.0457153	0.00102821	0.237736	0.00459322	0.0381214	0.00029378	0.0124829	0.00031382		0.1	35.87	216.6	3.77	241.2	1.82
TEM-05	0.0517159	0.00068048	0.394886	0.00571089	0.0571546	0.00037321	0.0182337	0.00025068		272.9	29.88	337.9	4.16	358.3	2.28
TEM-05	0.0549749	0.00060038	0.522386	0.00553584	0.0689249	0.00041582	0.0216857	0.00026747		411.2	23.99	426.7	3.69	429.7	2.51
TEM-06	0.0553948	0.00081646	0.508966	0.00714665	0.0666545	0.00045191	0.0217608	0.00041805		427.9	32.02	417.8	4.81	416	2.73
TEM-06	0.0553879	0.00074827	0.505033	0.00653996	0.066148	0.00042759	0.021395	0.00032331		427.6	29.75	415.1	4.41	412.9	2.59
TEM-07	0.056832	0.00094982	0.503152	0.00804365	0.0642228	0.00047416	0.0209714	0.00045754		484.3	36.94	413.8	5.43	401.3	2.87
Fine grained-monzonite (Sample ID AUR101934)
Interpreted crystallisation Age
U-Pb-AUR101934-28	0.05665	0.00076	0.47949	0.01128	0.06139	0.00078	0.01905	0.00056		478	28	398	8	384	4
U-Pb-AUR101934-13	0.05655	0.00094	0.49262	0.01374	0.06319	0.00088	0.01975	0.00074		474	40	407	10	395	6
U-Pb-AUR101934-11	0.05604	0.00096	0.49397	0.01414	0.06394	0.0009	0.01978	0.00084		454	38	408	10	400	6
U-Pb-AUR101934-10	0.05861	0.00114	0.50209	0.01612	0.06214	0.00096	0.01946	0.001		553	44	413	10	389	6
U-Pb-AUR101934-14	0.05854	0.0012	0.51211	0.01708	0.06345	0.001	0.02018	0.001		550	42	420	12	397	6
U-Pb-AUR101934-26	0.05326	0.00102	0.47339	0.01474	0.06447	0.00094	0.02037	0.00084		340	40	394	10	403	6
Inherited
U-Pb-AUR101934-15	0.10758	0.02534	1.1061	0.304	0.07457	0.0034	0.02161	0.00076		1759	386	756	146	464	20
U-Pb-AUR101934-1	0.08083	0.01598	0.85191	0.18722	0.07644	0.00206	0.02283	0.00058		1217	378	626	102	475	12
U-Pb-AUR101934-12	0.06408	0.00172	0.57337	0.0243	0.0649	0.0012	0.01994	0.0012		744	60	460	16	405	8
U-Pb-AUR101934-3	0.06215	0.00272	0.61005	0.04054	0.07122	0.00192	0.0188	0.00154		679	96	484	26	444	12
U-Pb-AUR101934-2	0.06958	0.0012	0.65315	0.01922	0.06809	0.00102	0.02145	0.00088		916	32	510	12	425	6
U-Pb-AUR101934-16	0.07876	0.0018	0.73516	0.02754	0.06771	0.0012	0.01824	0.00104		1166	44	560	16	422	8
U-Pb-AUR101934-9	0.05527	0.00078	0.53445	0.01302	0.07016	0.0009	0.02158	0.00058		423	30	435	8	437	6
U-Pb-AUR101934-25	0.05504	0.00132	0.53929	0.02018	0.07108	0.00114	0.0217	0.00116		414	52	438	14	443	6
U-Pb-AUR101934-7	0.05786	0.00128	0.59781	0.02112	0.07499	0.0012	0.02383	0.00114		524	44	476	14	466	8
U-Pb-AUR101934-24	0.0602	0.00134	0.55235	0.01974	0.06659	0.00108	0.02078	0.00118		611	44	447	12	416	6
U-Pb-AUR101934-8	0.0608	0.0016	0.56943	0.0237	0.06795	0.00126	0.02193	0.00118		632	56	458	16	424	8
Rejected
U-Pb-AUR101934-22	0.06195	0.00192	0.32062	0.0153	0.03832	0.00076	0.01005	0.0004		672	70	282	12	242	4
U-Pb-AUR101934-23	0.0482	0.001	0.24137	0.00762	0.03663	0.00048	0.01147	0.00026		109	50	220	6	232	2
U-Pb-AUR101934-21	0.04582	0.0009	0.26336	0.00792	0.04226	0.00052	0.01411	0.0003		-12	32	237	6	267	4
Coarse-grained quartz-monozite (Sample ID AUR101946)
Interpreted crystallisation age
U-Pb-AUR101946-19	0.05858	0.00056	0.61922	0.01132	0.07667	0.00088	0.02383	0.00056		552	20	489	8	476	6
U-Pb-AUR101946-11	0.05721	0.00068	0.62909	0.0135	0.07975	0.00096	0.02236	0.00082		500	26	496	8	495	6
U-Pb-AUR101946-16	0.05532	0.00142	0.63099	0.02562	0.0827	0.0015	0.02581	0.00164		425	58	497	16	512	8
U-Pb-AUR101946-18	0.05679	0.00088	0.63909	0.01736	0.08163	0.00116	0.02593	0.00106		483	34	502	10	506	6
U-Pb-AUR101946-14	0.0614	0.00136	0.66906	0.0239	0.07907	0.00128	0.01736	0.00094		653	46	520	14	491	8
U-Pb-AUR101946-12	0.06111	0.00164	0.6822	0.02894	0.08095	0.0015	0.02648	0.002		643	58	528	18	502	8
Rejected
U-Pb-AUR101946-10	0.06335	0.00172	0.60096	0.02518	0.06962	0.00124	0.0186	0.0013		720	56	478	16	434	8
U-Pb-AUR101946-15	0.07089	0.0011	0.65775	0.01766	0.06732	0.00094	0.00945	0.00044		954	32	513	10	420	6
U-Pb-AUR101946-7	0.05379	0.00064	0.43336	0.00896	0.06015	0.00066	0.01856	0.00066		362	26	366	6	377	4
U-Pb-AUR101946-6	0.05827	0.00106	0.49518	0.01472	0.06378	0.00088	0.01719	0.00084		540	40	408	10	399	6
U-Pb-AUR101946-8	0.05676	0.00122	0.52509	0.01806	0.0692	0.00106	0.02397	0.00124		482	46	429	12	431	6
U-Pb-AUR101946-20	0.05963	0.001	0.58113	0.01626	0.07068	0.00098	0.01866	0.00088		590	36	465	10	440	6
U-Pb-AUR101946-17	0.07696	0.00192	0.69079	0.02722	0.06513	0.00114	0.01474	0.00104		1120	50	533	16	407	6
U-Pb-AUR101946-9	0.07386	0.00552	0.72242	0.06518	0.07094	0.00144	0.0214	0.00034		1038	152	552	38	442	8
U-Pb-AUR101946-13	0.09405	0.00278	0.90852	0.0419	0.07008	0.0014	0.01532	0.0014		1509	54	656	22	437	8
U-Pb-AUR101946-1	0.04773	0.00118	0.31959	0.01208	0.0492	0.00076	0.01607	0.0009		86	60	282	10	310	4
U-Pb-AUR101946-2	0.04856	0.00054	0.32526	0.00622	0.04956	0.00048	0.01562	0.0005		127	26	286	4	312	2
U-Pb-AUR101946-5	0.05014	0.00094	0.34895	0.01036	0.05184	0.00068	0.00668	0.00032		201	48	304	8	326	4
U-Pb-AUR101946-4	0.05126	0.00068	0.35778	0.00798	0.05198	0.00056	0.01596	0.00054		253	32	311	6	327	4
Microdiorite (Sample ID AUR101955)
Interpreted crystallisation Age
U-Pb-AUR101955-10	0.05642	0.00152	0.52027	0.02198	0.0669	0.00122	0.01902	0.00136		469	62	425	14	417	8
U-Pb-AUR101955-3	0.05657	0.00128	0.48761	0.01752	0.06254	0.001	0.01944	0.00116		475	48	403	12	391	6
U-Pb-AUR101955-2	0.05832	0.00138	0.49	0.01832	0.06096	0.001	0.01935	0.00124		542	52	405	12	381	6
Rejected
U-Pb-AUR101955-6	0.06115	0.00206	0.52429	0.02652	0.0622	0.00126	0.01777	0.00156		645	74	428	18	389	8
U-Pb-AUR101955-1	0.0555	0.00122	0.50318	0.01778	0.06578	0.00106	0.0216	0.00138		432	46	414	12	411	6
U-Pb-AUR101955-4	0.05669	0.00132	0.52046	0.01918	0.06658	0.0011	0.02135	0.00134		479	52	425	12	416	6
Inherited
U-Pb-AUR101955-7	0.05863	0.00132	0.5913	0.02114	0.07317	0.00116	0.02424	0.00132		553	48	472	14	455	6
Supplementary Material A Summary of U-Pb measurements for Cambrian and Devonian samples from the Loch Lilly - Kars Belt. Data include standards as well as Rejected analyses.

## Sheet: Table S2
Baatar et al. (2020). Australian Journal of Earth Sciences, 67, https://doi.org/10.1080/08120099.2019.1637937
Table S2. In-situ trace-element data compile from samples AU101934, AUR101946, AUR101955 and AUR101988, including GJ, 91500 and TEM2 zircon standard measurements.
	Trace element concentrations normalised to chondrite.
Element	Si28	Si29	P31	Ti49	Y89	Zr90	Zr91	Zr92	Nb93	La139	Ce140	Pr141	Nd146	Sm147	Eu151	Gd157	Dy163	Ho165	Er166	Yb173	Lu175	Hf177	Hf178	Ta181	Pb204	Pb206	Pb207	Pb208	Th232	U238
GJ-1	0.961	0.962	0.029	0.0079	118.39	89848.4	89852.8	89801	4.52	0.1	20.34	0.266	1.25	7.97	12.47	26.58	59.92	88.56	130.25	286.6	339.6	43377.2	43487.6	21.53	3.96	7.24	7.3	7.26	429.66	23611
GJ-2	0.956	0.955	0.0191	0.0077	118.02	89848.4	89852.8	89870.1	4.41	-0.03	20.42	0.325	1.14	7.78	13.08	25.59	59.54	89.32	129.92	287.37	337.6	43714.4	43646.3	23.17	11.52	7.28	7.23	7.28	426.72	23621.5
GJ-3	0.974	0.974	0.028	0.0094	118	89848.4	89929.6	89603.5	4.51	0.05	20.4	0.322	1.13	7.85	12.91	26.19	59.61	88.56	129.56	284.94	339.17	42975.8	43393	22.32	13.2	7.46	7.48	7.64	427.88	23782.1
GJ-4	0.943	0.944	0.021	0.0064	118.43	89848.4	89774.7	90071.1	4.43	0.0016	20.35	0.27	1.27	7.9	12.61	26	59.86	89.3	130.65	289.07	338.09	44128.1	43739.3	22.26	2.5	7.07	7.06	6.93	428.63	23449
GJ-3	0.973	0.975	0.0278	0.0097	117.82	89848.4	89930.8	89589	4.53	0.053	20.45	0.323	1.125	7.87	12.92	26.13	59.32	87.98	128.79	283.75	336	42428.8	43062.7	22.31	14.39	7.4	7.42	7.6	423.81	23622.9
GJ-4	0.947	0.946	0.0217	0.0065	118.53	89848.4	89783.2	90059	4.42	0.0018	20.34	0.272	1.261	7.89	12.67	26.03	60.07	89.67	131.12	289.88	340.63	44435.5	43965.9	22.31	2.7	7.14	7.13	7	431.55	23610.8
GJ-5	0.943	0.942	0.0217	0.0077	118.36	89848.4	89855.4	89770.9	4.45	0.018	20.06	0.319	1.18	7.79	12.37	26.23	59.69	89.94	131.16	285.68	338.67	44792.5	43876.7	22.15	<-1.00	7.16	7.18	7.09	431.58	23363.6
GJ-6	0.972	0.973	0.026	0.0076	118.11	89848.4	89836	89943.3	4.48	0.007	20.7	0.263	1.22	7.97	13.16	25.93	59.81	88.06	129.19	288.75	338.67	42500.7	43313.3	22.47	16.11	7.33	7.3	7.39	425.24	23852.8
GJ-5	0.943	0.943	0.0221	0.0078	118.51	89848.4	89862.3	89775.9	4.47	0.017	20.05	0.317	1.174	7.79	12.36	26.19	59.51	89.6	130.73	284.75	337.44	44394.7	43585.3	22.12	<-1.00	7.14	7.16	7.08	428.91	23233.5
GJ-6	0.977	0.977	0.0264	0.0073	117.9	89848.4	89842.1	89946.3	4.47	0.007	20.77	0.26	1.227	7.97	13.29	25.97	60	88.2	129.4	289.89	340.01	42679.4	43570.4	22.54	14.99	7.39	7.36	7.46	427.43	24085.1
GJ-7	0.944	0.94	0.0249	0.013	118.01	89848.4	89741.3	89704.3	4.47	0.025	20.31	0.311	1.14	8.08	12.4	25.79	59.89	89.11	130.26	287.02	337.57	43355.4	43506.2	22.24	13.9	7.11	7.13	7.18	428.43	23308.2
GJ-8	0.969	0.974	0.0233	0.0052	118.45	89848.4	89951	89979.1	4.46	0.005	20.41	0.275	1.25	7.69	13.07	26.37	59.57	88.86	130.04	286.97	339.45	43852.9	43641.9	22.36	1.78	7.38	7.36	7.31	428.11	23863.4
GJ-7	0.944	0.939	0.0249	0.0089	117.93	89848.4	89739.8	89705.3	4.45	0.022	20.24	0.306	1.143	8.03	12.39	25.74	59.77	88.95	130.16	285.62	338.15	43321.3	43604.6	22.11	13.41	7.1	7.12	7.15	427.83	23183.5
GJ-8	0.974	0.98	0.0232	0.0065	118.53	89848.4	89965.3	90004.1	4.48	0.0049	20.54	0.275	1.259	7.72	13.2	26.49	59.72	88.95	130.13	289.03	339.05	43863.8	43542.8	22.54	1.64	7.43	7.41	7.37	428.75	24127
GJ-9	0.945	0.938	0.0263	0.0075	118.65	89848.4	89926.8	89923.1	4.43	0.02	20.04	0.295	1.19	7.83	12.71	25.73	59.35	89.01	129.05	281.96	338.97	43523.9	43581.3	22.17	9.15	7.15	7.12	7.08	427.08	23026.2
GJ-10	0.968	0.973	0.0224	0.008	117.81	89848.4	89766.7	89766.2	4.5	-0.01	20.67	0.291	1.2	7.94	12.76	26.36	60.09	88.9	131.09	291.63	338.19	43592.3	43573.5	22.41	6.12	7.32	7.36	7.4	429.21	24095.6
GJ-9	0.953	0.95	0.0259	0.0076	118.43	89848.4	89939.8	89948.7	4.47	0.39	20.26	0.298	1.194	7.86	12.89	25.85	59.52	88.99	129.03	285	337.41	43555.5	43469	22.42	8.33	7.22	7.19	7.16	427.52	23482.9
GJ-10	0.963	0.967	0.0223	0.00773	118.01	89848.4	89762.5	89765.9	4.47	0.03	20.49	0.287	1.198	7.87	12.66	26.29	59.98	88.92	131.34	289.34	339.96	43602.6	43717.9	22.19	6.07	7.29	7.32	7.34	429.14	23748.7
GJ-11	0.952	0.951	0.0244	0.00791	118.22	89848.4	89766.3	89638.8	4.45	0.021	20.46	0.283	1.188	8.15	12.44	26.31	59.66	88.98	129.37	286.64	337.02	43508.6	43249.6	22.31	9.7	7.17	7.11	7.31	426.47	23471.7
GJ-12	0.963	0.964	0.0239	0.00745	118.23	89848.4	89931.3	90054	4.48	0.006	20.3	0.301	1.202	7.63	13.08	25.85	59.8	88.93	130.78	287.43	340.02	43638.1	43884.4	22.31	4.87	7.33	7.38	7.19	429.89	23729.8
GJ-11	0.947	0.944	0.0246	0.00781	118.44	89848.4	89743.9	89637.6	4.42	0.026	20.27	0.281	1.187	8.08	12.38	26.21	59.52	88.99	129.62	284.6	339.22	43509.9	43349.2	22.11	9.81	7.13	7.08	7.26	426.82	23160.5
GJ-12	0.97	0.974	0.0236	0.00754	117.94	89848.4	89958.7	90078.4	4.54	0.005	20.51	0.306	1.203	7.67	13.26	25.96	60.03	88.9	130.7	290.4	337.96	43661.1	43849.9	22.52	4.5	7.39	7.45	7.25	430.07	24167.8
GJ-13	0.955	0.951	0.0246	0.00737	118.98	89848.4	89971.1	89972.2	4.3	0.0165	20.21	0.291	1.239	7.69	11.89	25.62	58.88	89.13	129.81	279.23	336.98	43357.6	43242.6	22.54	6.53	7.22	7.26	7.08	423.98	22905.7
GJ-14	0.958	0.961	0.0238	0.00797	117.6	89848.4	89727	89710.7	4.61	0.0106	20.51	0.291	1.157	8.08	13.54	26.5	60.47	88.8	130.31	293.9	340.07	43756.6	43835.1	22.08	8.62	7.25	7.21	7.41	431.79	24181.2
GJ-13	0.96	0.96	0.0242	0.0075	118.88	89848.4	90003.2	90001.5	4.41	0.0152	20.41	0.297	1.244	7.75	12.11	25.79	59.26	89.28	130.01	282.53	336.01	43451.7	43337.7	22.77	6.35	7.26	7.3	7.1	424.77	23361.9
GJ-14	0.955	0.955	0.024	0.008	117.63	89848.4	89688.8	89721.5	4.53	0.0111	20.35	0.29	1.15	8.04	13.51	26.43	60.27	88.62	130.31	291.89	341.56	43710.9	43827.1	21.9	7.79	7.23	7.19	7.4	432.07	23882.3
GJ-15	0.957	0.958	0.0242	0.007	117.51	89848.4	89858.3	89577.8	4.52	0.01	20.27	0.266	1.17	7.71	12.6	25.67	59.42	88.9	129.41	287.58	335.98	43508.3	43535.5	21.87	9.01	7.26	7.27	7.33	426.31	23441.2
GJ-16	0.959	0.958	0.0241	0.0084	118.92	89848.4	89847.2	90106.1	4.42	0.016	20.48	0.32	1.22	8.03	12.87	26.45	60	89.02	130.77	286.42	340.87	43630.8	43599.9	22.75	5.75	7.24	7.23	7.17	429.84	23747.5
GJ-15	0.958	0.958	0.024	0.00725	117.16	89848.4	89825.8	89629.4	4.51	0.014	20.31	0.271	1.172	7.72	12.55	25.59	59.18	88.47	129.02	287.18	335.21	43434.6	43404.2	21.91	8.6	7.27	7.27	7.36	425.75	23490.7
GJ-16	0.956	0.956	0.0237	0.00821	119.55	89848.4	89843.2	90101.8	4.42	0.015	20.44	0.324	1.228	8.04	12.95	26.63	60.45	89.52	131.54	286.99	343.17	43762.7	43796.7	22.82	5.91	7.23	7.23	7.15	431.43	23737.3
GJ-17	0.963	0.96	0.0268	0.00738	117.66	89848.4	90042.7	89828.8	4.47	0.0093	20.49	0.263	1.168	8.06	13.06	26.18	59.34	88.88	129.23	287.17	334.5	43412.4	43418.8	22.05	6.08	7.24	7.22	7.13	426.13	23620.2
GJ-18	0.953	0.955	0.0219	0.0079	118.57	89848.4	89680.9	89837.3	4.47	0.0158	20.27	0.316	1.217	7.71	12.49	25.93	60.01	88.95	130.75	287.04	341.7	43697.2	43687.8	22.48	8.42	7.26	7.28	7.37	429.73	23580.3
91500-1	0.869	0.896	0.0135	0.0111	74.17	89848.4	89494.4	89877.9	3.32	-0.08	3.01	0.067	0.386	2.33	3.1	9.18	35.59	68	122.13	355.42	397.99	39706.7	41118.5	24.38	14.02	4.29	5.5	25.02	807.67	8282.22
91500-2	0.932	0.895	0.0129	0.0055	75.09	89848.4	89769.5	89825.3	2.99	0.026	2.535	0.088	0.321	1.7	2.49	7.75	34.72	65.85	119.67	308.3	428.99	42448.8	39475.1	20.55	12.04	4.26	5.43	22.29	766.35	6573.11
91500-2	0.927	0.895	0.0144	0.0059	74.78	89848.4	89763.3	89808.2	3.08	0.033	2.589	0.088	0.319	1.71	2.48	7.85	34.52	64.72	117.84	304.91	417.89	41098.6	38682.7	20.65	13.27	4.16	5.32	24.93	746.92	6443.53
91500-3	0.91	0.89	0.0185	0.0089	75.95	89848.4	89785.3	90147.1	2.93	0.009	2.49	0.084	0.358	2	2.54	7.92	33.92	66	120.85	296.42	419.61	39690.3	40374.1	20.16	44.52	4.11	5.13	22.44	756.38	6227.82
91500-3	0.918	0.896	0.0182	0.017	75.59	89848.4	89790.7	90148.1	2.9	0.008	2.508	0.083	0.361	2.01	2.59	7.95	34.23	66.47	121.64	299.7	424.45	40376.6	41122.9	20.31	28.5	4.19	5.23	22.85	768.81	6383.44
91500-4	0.881	0.87	0.0157	0.0057	72.49	89848.4	90025.1	89879.1	2.93	0.016	2.61	0.092	0.318	2.04	2.6	7.71	33.45	63.14	118.5	300.43	403.78	39291.8	42334.8	19.45	6.06	3.86	4.86	20.33	726	6374.97
91500-4	0.888	0.882	0.0154	0.0071	72.64	89848.4	90055.1	89928	2.97	0.018	2.601	0.094	0.321	2.07	2.65	7.65	33.69	63.38	118.76	306.28	402.15	39342.3	42048.2	19.89	5.36	3.92	4.93	20.75	729.2	6553.07
91500-5	0.96	0.951	0.0156	0.0095	73.25	89848.4	89871.1	90014.3	3.17	-0.01	2.79	0.066	0.316	1.71	3.13	8.23	35.4	65.98	117.89	339.56	393.18	39877.3	38957.7	22.43	11.1	4.43	5.46	24.81	779.73	7953.53
91500-5	0.942	0.927	0.0158	0.00885	73.62	89848.4	89849.5	89988.1	3.09	0.05	2.712	0.063	0.315	1.67	3.03	8.15	35.17	66.02	118.36	330.65	399.14	39867.2	39317.7	21.75	12.02	4.34	5.35	24.12	778.67	7575.28
91500-6	0.874	0.833	0.0207	0.00799	76.47	89848.4	89597.6	89754.8	2.736	0.048	2.471	0.102	0.294	2.09	2.43	7.78	34.2	67.04	124.2	297.98	434.3	40044.2	40607.8	19.99	11.03	4.1	5.17	22.07	804.03	6219.82
91500-6	0.891	0.858	0.0199	0.00829	75.94	89848.4	89674.6	89804.7	2.82	0.027	2.547	0.106	0.295	2.13	2.51	7.87	34.54	66.98	123.8	306.38	426.27	40085.3	40450.5	20.56	12.45	4.19	5.28	22.56	804.06	6539.43
91500-7	0.923	0.933	0.015	0.00974	72.13	89848.4	90146.1	89916.4	3.17	0.0032	2.91	0.085	0.34	1.87	2.99	8.24	35.92	65.61	116.96	334.88	383.64	40285.1	40668	21.67	16.02	4.21	5.38	21.83	750.69	7935
91500-7	0.913	0.911	0.0155	0.0094	72.22	89848.4	90037.3	89908.9	3.05	0.0038	2.837	0.083	0.335	1.83	2.92	8.15	35.45	65.24	116.78	326.41	388.11	40114	40564.2	21.11	13.49	4.17	5.32	21.75	750.28	7585.34
91500-8	0.872	0.865	0.0205	0.0117	71.97	89848.4	89911.6	89943.8	2.99	0.58	3.1	0.256	0.48	2.29	3.11	8.48	34.96	65.07	117.84	333.01	387.41	40209.8	39458.5	23	24.14	4.12	6.44	30.86	773.66	7581
91500-8	0.865	0.861	0.02	0.0114	73.02	89848.4	90001	89900.5	3	0.35	3.07	0.253	0.461	2.31	3.12	8.67	35.64	66.2	119.64	334.37	394.05	40529.1	39967.5	23.11	26.82	4.1	6.42	30.48	781.13	7535.9
91500-9	0.855	0.821	0.0217	0.008	78.25	89848.4	89523.6	89219.5	2.73	-0.011	2.53	0.074	0.293	1.97	2.58	8.46	36.12	68.82	124.62	311.8	430.3	38763	40517.9	20.07	16.03	4.09	5.19	22.24	799.41	6583.25
TEM-1	0.928	0.948	0.095	0.0171	751.45	89848.4	89707.2	89733.9	3.01	0.46	4.77	1.45	4.93	22.61	13.21	111.63	375.2	645.4	1026.98	2268.45	2616.49	58425.7	61268.2	13.93	4.99	3.68	3.35	23.83	2176.21	18038.5
TEM-3	0.872	0.864	0.108	0.0162	566.58	89848.4	89914	89897.8	1.955	0.16	3.56	0.98	3.94	21.59	9.37	80.99	269.31	473.61	757.58	1425.41	1932.42	62653.1	61891.6	10.26	59.75	2.42	2.2	16.74	1508.76	10331.4
TEM-3	0.895	0.879	0.107	0.0136	545.53	89848.4	89887	89894.6	1.959	0.13	3.61	0.9	3.75	20.41	9.08	77.74	263.1	463.6	743.69	1429.01	1957.42	64255.1	64031.5	10.77	23.59	2.62	2.37	17.35	1553.33	11121.4
TEM-4	0.91	0.915	0.088	0.0382	545.47	89848.4	89615.3	89619.2	1.854	17.48	10.67	7.58	9.29	22.02	22.68	78.75	260.36	455.74	741.39	1449.27	1890.87	72741.2	70900.2	8.68	4.01	4.26	4.51	34.94	2821.49	19185.2
TEM-4	0.994	0.957	0.125	0.059	559.42	89848.4	89971.2	89790.4	2.13	3.74	6.63	2.85	4.77	17.17	13.51	71.2	256.28	467.44	769.4	1460.57	2080.3	66406.6	68907.8	9.66	5.25	4.87	4.91	34.29	2858.89	19757
TEM-5	1.041	1.03	0.092	0.0112	460.16	89848.4	89876.3	89972.8	2.364	-0.17	4.82	0.82	2.02	11.62	10.13	52.14	203.15	376.37	660.04	1774.81	2129.78	75474.7	71483.1	13.68	4.52	8.59	7.81	54.25	4116.58	39023.1
TEM-5	1.008	0.986	0.094	0.01008	464.09	89848.4	89837.5	89920.7	2.264	0.76	4.6	0.765	2.002	11.24	9.6	51.28	200.94	376.76	664.01	1696.17	2183.54	75418.4	72569.4	12.98	5.35	8.32	7.55	51.71	4106.03	35913.2
TEM-6	0.769	0.766	0.098	0.0193	892.25	89848.4	89342.4	90059	1.792	0.4	3.47	1.67	5.52	26.55	14.53	122.02	442.22	758.35	1169.33	1988.96	2633.76	63885.9	62106.7	7.9	9.96	3.46	3.39	29.38	3179.35	16459
TEM-6	0.791	0.801	0.092	0.0204	881.49	89848.4	89496.4	90078.1	1.88	0.18	3.64	1.78	5.62	27.01	15.21	125.01	448.6	757.4	1161.59	2079.32	2549.39	63977.8	61718.1	8.49	7.31	3.57	3.32	30.43	3181.32	17860.7
TEM-7	0.999	1.015	0.125	0.0258	1185.52	89848.4	89899.6	89753.4	2.67	0.044	5.14	2.61	7.53	46	24.71	200.79	678.56	1095.35	1612.82	2998.9	3082.72	58889.6	60208.2	16.07	13.59	3.05	2.74	25.65	2233.97	14915.7
TEM-7	0.959	0.962	0.138	0.0259	1264.6	89848.4	89780.1	89648.3	2.56	0.061	5.07	2.34	7.52	49.11	25.47	215.25	718.29	1156.27	1690.73	2955.01	3174.91	58588.1	59494.2	15.71	8.57	2.81	2.546	25.03	2242.52	13245.4
TEM-8	0.926	0.911	0.1	0.0199	342.34	89848.4	89232.1	89997.9	2.21	0.34	3.59	0.35	1.22	8.19	3.81	36.81	145.64	277.59	485.34	1177.62	1611.65	64259.5	61083.7	15.03	4.16	2.899	2.71	14.33	1190.96	12683
TEM-8	0.916	0.907	0.097	0.0189	349.89	89848.4	89272.6	89841.7	2.21	0.105	3.58	0.347	1.262	8.23	3.92	37.79	150.03	285.09	497.05	1187.91	1652.26	65138.3	62296.8	15.03	4.16	2.879	2.69	14.15	1208.44	12628.2
TEM-9	0.876	0.836	0.113	0.0181	361.31	89848.4	89336.8	89304.9	1.996	0.067	2.91	0.38	1.29	8.93	5.16	43.39	164.57	299.32	508.16	1106.07	1642.24	60893.5	61591.7	14.04	2.2	1.822	1.624	8.54	787.91	7900.26
TEM-1	<-1.00	<-1.00	415252	<-1.00	<-1.00	89848.4	7.08299e+06	0	2.09313e+06	<-1.00	<-1.00	4.43255e+06	3.83722e+06	<-1.00	<-1.00	<-1.00	1.16534e+06	8672646	<-1.00	9102115	20079246	25105144	6.17688e+06	41703464	910019008	<-1.00	<-1.00	<-1.00	27289520	<-1.00
Fine-grained quartz monzonite
TRACE-AUR101934-17	0.913	0.872	0.132	0.0197	484.86	89848.4	89810.1	89271.8	5.27	65.46	46.01	23.89	28.79	79.79	50.81	127.49	272.91	409.05	651.97	1498.78	1793.33	74621.1	77975.2	42.51	19.92	5.67	10.56	110.19	7342.71	24039.3
TRACE-AUR101934-4	0.925	0.887	0.27	0.12	1939.41	89848.4	89700.3	89578.2	10	380.61	239.99	233.43	335.7	683.27	403.71	870.26	1437.19	1699.8	2202.29	3717.13	3900.31	61887.3	58704.7	44.88	20.81	6.57	9.08	148.42	28428.2	42155.3
TRACE-AUR101934-3	0.974	0.928	0.151	0.0196	664.9	89848.4	90146.9	90248.3	4.54	3.58	32.24	3.14	7.73	37.01	19.03	128.76	373.09	594.71	859.63	1539	1949.18	68712.5	65973.3	30.18	13.09	3.99	4.61	73.31	5903.67	17914.3
TRACE-AUR101934-2	0.916	0.874	0.14	0.0158	1102.25	89848.4	89940.8	90252.8	6.21	4.4	55.46	6.08	15.73	68.21	42.65	243.76	639.97	985.47	1396.84	2608.71	3005.42	72264.4	73014.1	38.46	9.09	7.24	7.16	152.17	13799	33891.9
TRACE-AUR101934-1	1.311	1.207	0.87	0.35	441.77	89848.4	89979.5	89678.4	7.36	419.6	114.49	56.68	52.25	64.46	41.08	105.27	249.08	378.53	579.09	1302.24	1665.66	83177.6	84689.5	54.42	50.79	5.79	16.44	177.64	7245.2	22683.5
TRACE-AUR101934-7	1.038	0.988	0.153	0.0126	677.37	89848.4	89697.5	90167.7	4.35	4.31	41.9	6.44	11.4	44.21	27.83	134.47	372.01	583.58	878.45	1730.24	2354.92	80439.8	76026.6	32.95	<-1.00	8.2	8.76	148.76	11056.8	30373.9
TRACE-AUR101934-24	0.952	0.902	0.144	0.0149	720.95	89848.4	89917.7	89619.6	5.38	2.69	39.75	4.14	9.78	44.78	28.34	138.34	401.72	635.29	947.24	1790.58	2230.81	70164.4	70229.8	33.52	9.18	5.3	5.5	92.52	8158.87	23198.5
TRACE-AUR101934-25	1.031	0.972	0.25	0.0094	817.72	89848.4	89439.1	89787.6	4.5	1.7	38.77	3.13	9.52	45.77	28.78	172.49	453.13	719.71	1067.52	1885.91	2494.18	73657.8	68479.1	26.4	0.56	6.58	6.18	118.34	9708.27	25407.3
TRACE-AUR101934-11	0.872	0.819	0.112	0.009	315.7	89848.4	88591.5	89325.8	3.83	0.73	26.34	1.25	3.16	14.27	11.25	52.13	145.29	249.42	422.62	1046.13	1362.33	79307.1	79123.1	24.93	<-1.00	3.66	3.67	47.9	4440.8	17900.2
Coarse-grained quartz -monzonite
TRACE-AUR101946-16	0.913	0.911	0.122	0.0255	600.36	89848.4	90247.1	90059.1	5.31	17.45	40.38	36.91	44.4	66.45	44.92	112.2	306.51	532.26	888.78	2136.06	3075.73	92552.3	87515.1	30.37	7.78	7.5	7.72	113.84	9963.12	29423.3
TRACE-AUR101946-14	0.953	0.942	0.165	1.25	630.33	89848.4	89770.4	89842.4	61.79	348	543.96	654.13	746.78	547.09	294.28	312.92	355.59	549.54	902.58	2168.93	3301.94	94781.1	90230.8	48.28	115.78	11.09	25.18	276.44	88069.3	39442.2
TRACE-AUR101946-13	0.843	0.845	0.199	0.47	905.5	89848.4	89714.1	89119.3	48.64	435.75	666.5	916.79	1068.03	921.81	492.12	539.32	496.3	729.09	1136.78	2796.85	4008.77	89810.3	85418.4	77.03	121.95	11.9	27.98	290.81	36399.5	51236.9
TRACE-AUR101946-12	0.853	0.824	0.198	0.129	831.53	89848.4	89897.4	90315.8	12.08	156.82	281.06	311.26	354.99	283.59	152.22	211.71	393.25	697.82	1210.13	2914.95	4549.41	88620.4	85181.3	59.47	33.2	13.35	15.97	180.13	20835.7	55865.3
TRACE-AUR101946-11	0.94	0.931	0.135	0.0173	510.21	89848.4	89472.8	89533.4	6.38	17.87	43.98	31.08	39.01	50.53	32	75.32	227.01	431.99	763.72	1967.53	3081.18	88206.5	84629.3	48.43	12.69	10.31	9.98	131	10587.2	37121
TRACE-AUR101946-9	0.872	0.867	0.159	0.134	764.83	89848.4	89721	89598.8	16.33	174.36	293.28	375.61	435.71	489.77	291.58	334.36	401.11	610.4	987.77	2451.35	3539.5	88571.5	84327.7	60.44	233.61	12.3	33.86	305.98	20011.6	45904.9
TRACE-AUR101946-18	0.841	0.845	0.134	0.031	681.99	89848.4	90674.2	90150.1	11.47	92.27	130	141.6	160.12	168.16	81.13	155.66	317.83	568.15	971.1	2574.4	3562.02	91003.7	87407.5	112.82	133.97	21.77	31.7	303.95	17858	85972.2
TRACE-AUR101946-5	0.889	0.895	0.175	0.55	979.08	89848.4	90044	90205.4	25.69	430.41	663.54	832.81	904.73	797.79	369.69	493.33	540.01	785.5	1213.31	2736.55	3880.55	83918.6	80849.7	53.95	25.95	8.55	8.7	151.48	38892.4	37963.6
TRACE-AUR101946-4	0.815	0.818	0.36	0.05	740.7	89848.4	90199.3	89425.7	6.38	62.58	86.51	86.75	99.38	109.07	57.93	138.24	361.63	624.17	1046.97	2509.81	3545.22	80160.9	77992.1	38.09	24.14	9.09	9.32	136.8	12375.5	35413.5
TRACE-AUR101946-2	0.899	0.9	0.229	0.0198	591.48	89848.4	89772.3	89769.1	6.18	30.37	40.74	27.3	32.56	38.47	24.37	74.55	249.32	480.07	849.05	2070.27	3076.96	77028.3	74336.2	49.15	35.7	9.94	9.73	114.08	8322.17	34550.2
Microdiorite
TRACE-AUR101955-10	0.84	0.779	1.91	0.074	1066.61	89848.4	90139.4	89227.3	7.29	304.08	176.08	102.21	96.81	116.67	74.14	270.05	566.57	864.12	1258.76	2085.51	2863.47	64546.8	68469.5	43.82	40.15	10.55	11.69	238.54	46163.2	52763.7
TRACE-AUR101955-28	0.877	0.811	0.262	0.037	917.45	89848.4	90085.6	89909.4	7.59	16.26	83.51	12.37	19.65	58.63	36.53	181.6	453.53	733.69	1119.62	1935.37	2759.71	78495.7	79577.4	52.72	180.12	14.51	14.97	263.31	29712	63983.5
TRACE-AUR101955-26	0.821	0.777	1.1	0.07	1344.34	89848.4	90267.1	89398.9	8.22	144.35	123.51	59.75	67.43	124.89	72.99	321.16	729.57	1088.85	1539.7	2549.42	3253.12	64729.5	63833	46.54	154.14	11.59	13.06	301.62	40216.8	60817.5
TRACE-AUR101955-30	0.852	0.862	0.202	0.045	824.53	89848.4	89968.4	89740.6	5.57	9.9	55.91	12	21.79	72.47	49.86	220.04	485.09	716.09	1012.2	1758	2205.91	67922.4	65958.4	39.73	45.74	8.17	9.01	157.83	15488	36102.1
TRACE-AUR101955-31	0.905	0.848	0.202	0.032	869.05	89848.4	90137.4	89540.7	4.55	11.54	50.76	10.37	20.2	67.39	41.97	204.82	475.88	716.64	1051.55	1712.75	2447.83	63735.4	66960	28.46	59.7	7.75	8.32	129.4	11413.8	32768
TRACE-AUR101955-34	0.855	0.839	3.43	0.035	1152.66	89848.4	90006.9	89822.2	5.66	458.26	233.9	162.06	141.16	149.48	76.07	305.55	641.28	953.13	1346.82	2265.5	2843.63	69322.6	67743.9	35.7	67.14	8.46	9.5	182.82	17622.5	37827.8
TRACE-AUR101955-24	0.843	0.783	0.278	0.034	1752.7	89848.4	88901.9	89164.7	6.37	26.41	76.63	17.28	32.13	110.48	74.61	371.68	891.24	1351.48	1924.75	3030.65	4237.39	67582.7	67404.6	37.01	51.11	12.35	12.58	284.19	33535.2	59153.7
TRACE-AUR101955-25	0.785	0.768	0.41	0.032	769.16	89848.4	89855.5	89942.8	3.66	56.09	57.19	21.66	27.58	67.38	38.28	196.44	445.71	659.8	935.03	1559.5	2017.79	68566.6	67872.6	21.24	26.59	5.03	5.18	94.75	8778.36	22270.7
Monzodiorite
TRACE-AUR101988-68	1.273	1.307	0.155	0.08	790.98	89848.4	90939	91130.3	12.71	57.16	86.08	58.2	61.05	111.38	27.95	209.28	510.83	738.51	1060.94	2459.86	2007.74	58899.3	62241.2	107.37	16.89	22.75	21.98	337.58	19658.2	101583
TRACE-AUR101988-77	1.111	1.095	0.141	0.065	831.25	89848.4	89965.6	90131.5	11.14	38.93	57.18	37.15	43.01	91.37	20.74	227.78	535.8	772.52	1083.01	2386.79	2144.91	58788.3	62935.4	95.32	18.76	18.9	18.37	308.74	20127.3	82242.8
TRACE-AUR101988-69	1.193	1.182	0.147	0.0603	740.87	89848.4	89908.5	89327.5	9.73	0.5	23.88	9.07	21.13	80.81	18.03	212.02	491.7	704.5	964.48	2201.86	1883.14	58251.8	61848.5	81.29	9.76	16.94	16.46	278.82	16807.5	70260.6
TRACE-AUR101988-71	0.951	0.895	0.131	0.0466	837.92	89848.4	88577.4	88756.7	8.07	10.51	28.81	8.92	19.37	71.45	14.4	206.44	497.6	733.62	1055.96	1997.56	2334.86	66118.8	65972.1	65.5	46.49	16.09	16.4	243.58	18377.4	66105.9
TRACE-AUR101988-72	1.072	1.05	0.182	0.058	1661.52	89848.4	89986.9	89562.7	34.21	112.22	101.41	32.77	39.67	108.18	15.82	327.85	896.22	1378.64	2041.13	4332.24	4288.13	85638.1	83270.9	284	19.91	88.96	85.02	1063.23	76888.9	398617
TRACE-AUR101988-73	0.972	0.915	0.168	0.287	1169.11	89848.4	89238.7	89231.6	15.29	83.12	79.86	41.42	40.6	86.63	13.71	237.67	632.98	997.3	1513.99	2890.16	3386.78	72341	69919.3	129.06	36.71	44.22	44.18	440.83	30587.6	177665
TRACE-AUR101988-75	1.274	1.227	0.163	0.059	786.96	89848.4	90574.4	91026.7	11.59	0.92	28.12	9.02	21.56	86.27	17.21	203.25	499.08	732.19	1030	2440.28	1993.09	59422.1	62599.2	100.6	11.64	23.57	22.74	368.1	19873.5	97460
TRACE-AUR101988-74	1.115	1.043	0.104	0.052	367.43	89848.4	88641	90674.6	8.19	69.8	50.41	26.71	25.44	43.47	12.68	98.46	228.52	333.91	478.7	1137.14	1022.1	59244.4	62725.5	48.81	13.66	8.76	8.22	113.88	6528.16	35922.2
TRACE-AUR101988-76	0.896	0.852	0.112	0.0433	640.52	89848.4	89799.4	89721.4	7.5	3.35	21.82	5.74	14.01	60.81	12.08	159.58	389.06	581.74	835.28	1616.19	1739.75	67513.8	68681.6	62.61	8.56	12.62	12.32	189.8	13829.2	49925.4
Supplementary Material B In-situ trace element data compile from samples AU101934, AUR101946, AUR101955 and AUR101988, including GJ, 91500 and TEM2 zircon standard measurements.

## Sheet: Table S3
Baatar et al. (2020). Australian Journal of Earth Sciences, 67, https://doi.org/10.1080/08120099.2019.1637937
Table S3. Oxygen isotope collected data, for samples AUR101934, AUR101946 and AUR101955. Data include Penglai and TEM2 zircon standards.
	RAW DATA from CIPS		Drift corrected or raw ratios if no drift		SIMS corrected ratios		FINAL DELTA
							Delta values
Spot	18O/16O	s int in rel.%	18O/16O	s abs	18/16O	s abs	δ18O	2s abs
PL-01	0.00201392	0.00632543	0.00201364	1.27405e-07	0.00201587	3.48029e-07	5.32234	0.347127
PL-02	0.00201361	0.00717176	0.00201334	1.44426e-07	0.00201557	3.54583e-07	5.17058	0.353664
PL-03	0.00201325	0.0101526	0.00201298	2.04407e-07	0.00201521	3.82965e-07	4.99386	0.381972
PL-04	0.00201431	0.011678	0.00201405	2.3524e-07	0.00201628	4.00449e-07	5.52608	0.39941
PL-05	0.00201404	0.0112992	0.00201379	2.27579e-07	0.00201602	3.95952e-07	5.39429	0.394926
PL-06	0.00201367	0.00625835	0.00201346	1.26039e-07	0.00201569	3.47503e-07	5.23062	0.346601
PL-07	0.00201428	0.00894377	0.00201408	1.80164e-07	0.00201631	3.70718e-07	5.53818	0.369757
PL-08	0.00201392	0.00997094	0.00201376	2.00817e-07	0.00201599	3.81163e-07	5.37951	0.380174
PL-09	0.00201416	0.0176921	0.002014	3.56354e-07	0.00201623	4.81833e-07	5.50234	0.480584
PL-10	0.00201326	0.00773671	0.00201315	1.55773e-07	0.00201537	3.59338e-07	5.07407	0.358406
PL-11	0.00201365	0.00654739	0.00201354	1.31857e-07	0.00201577	3.49672e-07	5.27179	0.348765
PL-12	0.00201342	0.00624299	0.00201336	1.25714e-07	0.00201559	3.4737e-07	5.18104	0.346469
PL-13	0.00201336	0.0080591	0.00201331	1.62271e-07	0.00201553	3.62231e-07	5.15409	0.361292
PL-14	0.00201364	0.00959071	0.00201363	1.93133e-07	0.00201586	3.77144e-07	5.31494	0.376166
PL-15	0.00201398	0.0079288	0.00201397	1.59697e-07	0.0020162	3.61179e-07	5.4877	0.360243
PL-16	0.00201376	0.00934046	0.0020138	1.88105e-07	0.00201603	3.74612e-07	5.39893	0.373641
PL-17	0.00201395	0.0116492	0.00201399	2.34618e-07	0.00201622	4.00075e-07	5.4968	0.399037
PL-18	0.00201375	0.0110703	0.00201383	2.22937e-07	0.00201606	3.93303e-07	5.41801	0.392283
PL-19	0.00201327	0.00912309	0.00201336	1.83684e-07	0.00201559	3.72346e-07	5.18137	0.37138
PL-20	0.00201355	0.00947246	0.00201368	1.90744e-07	0.00201591	3.75931e-07	5.34223	0.374956
PL-21	0.00201328	0.00628682	0.00201346	1.26588e-07	0.00201569	3.47703e-07	5.2315	0.346801
PL-22	0.00201312	0.00946724	0.00201331	1.90598e-07	0.00201554	3.75805e-07	5.15463	0.37483
PL-23	0.00201302	0.00672402	0.00201325	1.35371e-07	0.00201548	3.50972e-07	5.12577	0.350061
PL-24	0.00201383	0.00840346	0.00201407	1.69244e-07	0.0020163	3.65523e-07	5.53317	0.364575
PL-25	0.00201337	0.00845591	0.00201364	1.70261e-07	0.00201587	3.65936e-07	5.32157	0.364987
PL-26	0.00201335	0.0087356	0.00201363	1.7589e-07	0.00201586	3.68592e-07	5.31459	0.367637
TEM-01	0.00201918	0.0121133	0.00201893	2.44597e-07	0.00202117	4.06655e-07	7.96347	0.4056
TEM-10	0.00201953	0.00694671	0.00201972	1.40306e-07	0.00202196	3.53864e-07	8.35787	0.352946
TEM-11	0.00201938	0.0122262	0.00201962	2.46902e-07	0.00202186	4.08136e-07	8.30705	0.407078
TEM-02	0.0020199	0.0112158	0.0020197	2.26557e-07	0.00202194	3.96144e-07	8.347	0.395116
TEM-03	0.00201983	0.011977	0.00201968	2.41924e-07	0.00202192	4.05145e-07	8.33613	0.404095
TEM-04	0.0020197	0.010029	0.0020196	2.02566e-07	0.00202183	3.82885e-07	8.2953	0.381892
TEM-05	0.00201932	0.00619449	0.00201927	1.25103e-07	0.00202151	3.48035e-07	8.13266	0.347133
TEM-06	0.00201917	0.00739909	0.00201917	1.49414e-07	0.00202141	3.575e-07	8.08185	0.356573
TEM-07	0.0020202	0.00683285	0.00202025	1.38052e-07	0.00202249	3.53052e-07	8.62015	0.352137
TEM-08	0.00201931	0.00622559	0.00201941	1.2573e-07	0.00202164	3.48282e-07	8.19989	0.347379
TEM-09	0.00201955	0.010961	0.00201969	2.21372e-07	0.00202193	3.93194e-07	8.34378	0.392175
Fine-grained quartz monzonite
O-AUR101934-1	0.00201425	0.00629626	0.00201427	1.26839e-07	0.0020165	3.47915e-07	5.63454	0.347013
O-AUR101934-10	0.00201524	0.00909097	0.00201535	1.83216e-07	0.00201758	3.72393e-07	6.17393	0.371427
O-AUR101934-11	0.00201244	0.0107611	0.00201255	2.1657e-07	0.00201478	3.8955e-07	4.77903	0.38854
O-AUR101934-12	0.00201466	0.00888532	0.00201478	1.79021e-07	0.00201701	3.70262e-07	5.89038	0.369302
O-AUR101934-13	0.00201542	0.0102264	0.00201555	2.06114e-07	0.00201778	3.84229e-07	6.27283	0.383232
O-AUR101934-14	0.00201504	0.010177	0.00201519	2.05081e-07	0.00201742	3.83626e-07	6.09515	0.382631
O-AUR101934-15	0.00201519	0.00744098	0.00201535	1.49964e-07	0.00201758	3.57173e-07	6.17304	0.356247
O-AUR101934-16	0.00201545	0.0062836	0.00201561	1.26659e-07	0.00201784	3.48051e-07	6.30586	0.347148
O-AUR101934-17	0.00201574	0.00670752	0.00201591	1.35221e-07	0.00201814	3.51308e-07	6.45365	0.350397
O-AUR101934-18	0.00201553	0.00819643	0.0020157	1.65214e-07	0.00201794	3.63905e-07	6.35182	0.362962
O-AUR101934-19	0.00201417	0.00762717	0.00201437	1.53638e-07	0.0020166	3.58593e-07	5.68487	0.357663
O-AUR101934-2	0.00201431	0.00952741	0.00201433	1.91922e-07	0.00201656	3.76622e-07	5.6675	0.375645
O-AUR101934-20	0.00201414	0.00752435	0.00201434	1.51565e-07	0.00201658	3.57704e-07	5.6729	0.356776
O-AUR101934-21	0.00201677	0.00838781	0.00201698	1.69175e-07	0.00201921	3.65907e-07	6.98895	0.364958
O-AUR101934-22	0.00201487	0.0109276	0.00201509	2.20186e-07	0.00201732	3.91913e-07	6.04337	0.390897
O-AUR101934-23	0.00201541	0.0147271	0.00201563	2.96818e-07	0.00201786	4.39727e-07	6.31598	0.438586
O-AUR101934-24	0.00201434	0.0121359	0.00201459	2.44467e-07	0.00201682	4.06019e-07	5.79381	0.404966
O-AUR101934-25	0.00201505	0.00807264	0.0020153	1.6268e-07	0.00201753	3.62702e-07	6.15129	0.361761
O-AUR101934-26	0.00201559	0.00718885	0.00201585	1.44912e-07	0.00201808	3.55151e-07	6.4239	0.35423
O-AUR101934-28	0.00201455	0.00620749	0.00201482	1.2507e-07	0.00201705	3.47355e-07	5.90768	0.346454
O-AUR101934-3	0.00201463	0.00653395	0.00201466	1.31651e-07	0.00201689	3.49761e-07	5.83027	0.348853
O-AUR101934-4	0.00201543	0.0120206	0.00201548	2.42275e-07	0.00201772	4.04815e-07	6.24171	0.403765
O-AUR101934-5	0.00201468	0.00938781	0.00201474	1.89145e-07	0.00201697	3.75267e-07	5.87028	0.374294
O-AUR101934-6	0.00201488	0.0102015	0.00201495	2.05557e-07	0.00201718	3.83848e-07	5.97314	0.382853
O-AUR101934-7	0.00201499	0.00965484	0.00201506	1.94555e-07	0.00201729	3.78073e-07	6.03107	0.377093
O-AUR101934-8	0.00201476	0.0062979	0.00201484	1.26904e-07	0.00201707	3.48024e-07	5.91925	0.347122
O-AUR101934-9	0.00201528	0.00649929	0.00201538	1.30995e-07	0.00201761	3.49621e-07	6.1909	0.348715
Coarse-grained quartz monzonite
O-AUR101946-1	0.00201593	0.0141517	0.00201569	2.85295e-07	0.00201792	4.32022e-07	6.3439	0.430901
O-AUR101946-10	0.00201597	0.00854932	0.0020158	1.72364e-07	0.00201803	3.67228e-07	6.39998	0.366275
O-AUR101946-11	0.00201627	0.0136207	0.00201613	2.74637e-07	0.00201836	4.25097e-07	6.56179	0.423994
O-AUR101946-12	0.00201534	0.00933632	0.0020152	1.8817e-07	0.00201743	3.7484e-07	6.10049	0.373868
O-AUR101946-13	0.00201546	0.0064682	0.00201533	1.3038e-07	0.00201756	3.49383e-07	6.16341	0.348477
O-AUR101946-14	0.00201583	0.00786994	0.0020157	1.58658e-07	0.00201794	3.60969e-07	6.35114	0.360033
O-AUR101946-15	0.00201505	0.0094452	0.00201493	1.90336e-07	0.00201716	3.75897e-07	5.96473	0.374922
O-AUR101946-16	0.00201577	0.00625972	0.00201567	1.26198e-07	0.00201791	3.47892e-07	6.33623	0.34699
O-AUR101946-17	0.00201823	0.0112254	0.00201814	2.26563e-07	0.00202037	3.95941e-07	7.56741	0.394914
O-AUR101946-18	0.00201651	0.0178274	0.00201643	3.59496e-07	0.00201866	4.84428e-07	6.7117	0.483171
O-AUR101946-19	0.00201447	0.00775226	0.00201439	1.5618e-07	0.00201662	3.59695e-07	5.69623	0.358762
O-AUR101946-2	0.00201563	0.00941294	0.00201539	1.89741e-07	0.00201763	3.7566e-07	6.19713	0.374685
O-AUR101946-20	0.00201487	0.0104399	0.0020148	2.1036e-07	0.00201703	3.86427e-07	5.89894	0.385425
O-AUR101946-3	0.00201583	0.010933	0.0020156	2.204e-07	0.00201783	3.92102e-07	6.29999	0.391085
O-AUR101946-4	0.00201443	0.00671829	0.00201421	1.35351e-07	0.00201644	3.51106e-07	5.60404	0.350195
O-AUR101946-5	0.00201547	0.00824287	0.00201525	1.66145e-07	0.00201748	3.64265e-07	6.12628	0.363321
O-AUR101946-6	0.00201625	0.00980974	0.00201606	1.97799e-07	0.00201829	3.79893e-07	6.52773	0.378908
O-AUR101946-7	0.00201591	0.00648817	0.00201572	1.30811e-07	0.00201796	3.49603e-07	6.36099	0.348697
O-AUR101946-8	0.00201667	0.00967317	0.00201649	1.95087e-07	0.00201872	3.78544e-07	6.74344	0.377563
O-AUR101946-9	0.00201503	0.0110247	0.00201486	2.2216e-07	0.00201709	3.92997e-07	5.92767	0.391978
Microdiorite
O-AUR101955-1	0.00201508	0.00702785	0.00201501	1.41631e-07	0.00201724	3.53699e-07	6.00679	0.352782
O-AUR101955-2	0.00201459	0.00627221	0.00201455	1.26376e-07	0.00201678	3.47788e-07	5.77419	0.346886
O-AUR101955-3	0.00201504	0.00765207	0.002015	1.54206e-07	0.00201723	3.58929e-07	6.00187	0.357998
O-AUR101955-4	0.00201508	0.00640319	0.00201505	1.29045e-07	0.00201728	3.48844e-07	6.02485	0.34794
O-AUR101955-5	0.00201536	0.00959468	0.00201534	1.93378e-07	0.00201757	3.77506e-07	6.16765	0.376527
O-AUR101955-6	0.00201504	0.00633037	0.00201502	1.27576e-07	0.00201725	3.48298e-07	6.01089	0.347395
O-AUR101955-7	0.00201561	0.011915	0.00201562	2.40168e-07	0.00201785	4.03572e-07	6.30751	0.402525
O-AUR101955-8	0.00201508	0.00628521	0.00201509	1.26668e-07	0.00201732	3.47976e-07	6.04591	0.347074
Supplementary Material C Oxygen isotope collected data, for samples AUR101934, AUR101946 and AUR101955. Data include Penglai and TEM2 zircon standards.

## Sheet: Table S4
Baatar et al. (2020). Australian Journal of Earth Sciences, 67, https://doi.org/10.1080/08120099.2019.1637937
Table S4. Whole-rock geochemical characterisation.
Sample	AUR101924	AUR101926	AUR101928	AUR101933	AUR101934	AUR101935	AUR101936	AUR101937	AUR101938	AUR101939	AUR101940	AUR101942	AUR101943	AUR101944	AUR101945	AUR101946	AUR101947	AUR101948	AUR101949	AUR101950	AUR101951	AUR101953	AUR101954	AUR101955	AUR101956	AUR101957	AUR101958	AUR101959	AUR101961	AUR101962	AUR101963	AUR101964	AUR101965	AUR101966	AUR101967	AUR101968	AUR101988	AUR101990	AUR101992
SiO2 %	50.75	51.16	50.88	47.62	63	55.09	62.4	46.08	47.04	45.19	55.21	54.14	55.81	51.64	49.13	68.69	47.41	48.06	48.69	45.86	48.28	49.74	48.44	56.52	56.76	49.46	60.14	48.48	60.27	47.1	65.9	45.01	45.09	48.19	48.25	49.06	56.16	55.12	50.12
Al2O3 %	14.64	15.59	14.48	14.32	15.67	14.2	16.75	15.85	15.86	15.43	16.01	14.26	18.48	14.84	14.83	14.55	13.51	14	14.46	14.91	13.76	14.2	15.83	15.32	16.08	16.49	16.15	15.71	16.21	17	16.7	12.49	14.62	13.04	16.36	16.89	16.79	16.7	13.32
Fe2O3 %	9.37	9.9	9.2	9.34	4.74	7.52	5.39	11.84	11.75	11.53	9.71	8.39	8.07	10.49	12.17	3.88	15.88	14.06	13.76	12.81	15.4	14.3	10.23	7.12	7.67	11.45	4.93	11.4	5.49	10.46	3.5	14.06	12.45	11.65	11.87	9.78	5.98	7.72	14.21
MgO %	5.07	5.49	4.33	5.11	2.86	6.3	2.22	7.61	6.54	6.11	5.28	6	2.26	7.17	6.46	1.43	6.84	7.49	6.77	9.09	6.43	4.2	7.5	5.65	4.71	4.57	2.7	6.93	2.79	7.65	1.4	13.39	11.93	10.32	7.1	7.36	3.47	3.47	3.91
CaO %	11.37	8.07	12.85	14.06	4.63	7.45	2.32	5.4	7.49	11.68	5.85	8.81	4.37	7.14	10.02	2.89	10.98	12.05	9.46	10.2	9.96	7.55	9.66	6.98	6.52	9.06	5.31	9.79	4.86	11.78	3.49	7.77	8.28	10.98	8.63	9.07	7.02	5.94	7.22
Na2O %	4.75	5.73	4.66	4.2	4.24	3.8	5.51	4.61	4.43	3.23	3.3	4.68	4.15	4.56	3.29	3.12	1.94	2.09	2.33	2.21	2	3.61	2.67	3.66	3.76	3.93	5.65	2.97	5.62	2.29	4.96	1.3	1.89	2.09	3.29	2.93	6.19	3.99	3.72
K2O %	0.26	0.39	0.25	0.24	2.07	1.53	2.03	0.53	0.46	0.03	1.62	0.56	3.95	0.87	0.56	3.42	0.54	0.16	0.51	0.96	0.59	0.72	0.79	2.29	1.84	1.03	0.36	0.97	0.8	0.26	2.15	0.67	0.6	0.09	0.9	1.27	1.16	3.87	1.35
TiO2 %	1.59	1.63	1.59	1.55	0.55	0.74	0.43	2.09	2.07	2.13	0.97	0.91	1.1	0.91	1.8	0.4	1.8	1.41	1.65	1.4	1.77	2.91	1.01	0.79	0.94	2.5	0.62	2.18	0.62	1.48	0.37	1.49	1.34	1.06	1.96	1.41	0.97	1.01	2.95
P2O5 %	0.24	0.25	0.23	0.23	0.18	0.81	0.3	0.36	0.32	0.3	0.28	0.32	0.46	0.24	0.24	0.11	0.15	0.08	0.23	0.16	0.15	0.45	0.34	0.36	0.21	0.45	0.27	0.36	0.26	0.25	0.18	0.23	0.21	0.15	0.34	0.39	0.43	0.41	1.05
MnO %	0.24	0.19	0.23	0.29	0.06	0.12	0.06	0.17	0.18	0.17	0.12	0.15	0.04	0.13	0.19	0.09	0.26	0.23	0.24	0.2	0.25	0.39	0.17	0.12	0.11	0.21	0.06	0.17	0.05	0.18	0.04	0.2	0.18	0.21	0.17	0.15	0.09	0.13	0.28
Cr2O3 %	0.021	0.023	0.021	0.024	0.013	0.034	0.005	0.015	0.018	0.015	0.06	0.054	0.006	0.074	0.025	0.004	0.008	0.018	0.02	0.034	0.006	0.003	0.057	0.039	0.013	0.014	0.01	0.031	0.009	0.026	0.005	0.055	0.041	0.032	0.016	0.016	0.008	0.007	0.004
Mo ppm	0.7	0.8	1.2	2	0.3	0.3	1	0.4	0.4	0.8	0.5	0.9	0.6	0.3	0.2	<0.1	<0.1	0.1	0.3	<0.1	0.1	0.8	0.6	1.4	0.6	0.8	0.2	0.5	1.1	1	1.6	0.4	0.7	0.3	0.8	0.4	1.4	2.3	1.3
Cu ppm	39	19.6	44.4	40.4	17.5	36	8.8	46.3	29.6	43.1	11.7	3.9	3.8	5.2	66.3	2.7	50.3	119.6	56.8	64.8	73.3	156.2	544.6	87.8	22.5	33	7.2	18.1	1.7	29.8	27.9	32.3	11.5	97.4	18.4	17.2	29	40.8	24.1
Pb ppm	20.1	16.5	29.4	33.9	6.8	7.7	13.9	4.1	4.1	4.2	4.9	5.4	5.1	2.5	7.1	10.4	4	1.5	6.3	3.3	5.5	5.7	14.6	13.5	9.4	7.4	9.6	4.6	8.7	6.2	10.7	3.2	2.9	3.2	3.4	4	12.5	20.9	7.7
Zn ppm	155	160	150	211	53	73	66	105	88	92	42	44	21	58	92	43	117	101	128	97	132	108	161	73	68	73	42	85	40	75	33	97	70	65	67	64	31	59	106
Ni ppm	35	46.7	38.2	35.9	41.8	92.2	29.2	72.6	72.5	68.4	145.7	169.2	45.9	129.3	41	4.8	34.3	48.8	47.8	88.1	37.3	24.6	130.9	85.5	31.9	35.8	28.2	64.7	26.9	78.4	10.9	224.3	175.2	137.5	89.8	95	25.4	23.8	6.9
As ppm	<1	1	<1	<1	<1	<1	<1	<1	<1	<1	1	3	2	1	<1	<1	<1	<1	<1	<1	1	2	1	<1	<1	<1	<1	<1	<1	<1	<1	<1	3	3	2	2	5	2	4
Cd ppm	0.5	0.3	0.6	0.5	<0.1	0.1	0.2	0.1	<0.1	0.4	<0.1	<0.1	0.1	<0.1	<0.1	<0.1	0.2	0.1	<0.1	0.1	0.1	1	0.9	0.1	0.2	0.2	<0.1	0.2	<0.1	0.2	0.1	<0.1	<0.1	<0.1	0.2	<0.1	<0.1	<0.1	<0.1
Sb ppm	0.4	0.2	0.6	0.3	<0.1	0.2	0.3	<0.1	<0.1	0.3	0.2	1.1	0.4	0.5	0.2	0.2	0.7	<0.1	0.4	0.1	0.8	0.4	0.3	0.2	1.4	0.5	0.6	2	0.3	0.9	0.1	0.6	0.5	0.3	0.5	0.6	1.1	0.3	0.4
Bi ppm	0.3	0.2	0.3	0.2	<0.1	0.1	0.2	<0.1	<0.1	<0.1	<0.1	<0.1	<0.1	<0.1	<0.1	<0.1	<0.1	<0.1	<0.1	<0.1	<0.1	<0.1	<0.1	0.1	<0.1	<0.1	<0.1	<0.1	<0.1	<0.1	<0.1	<0.1	<0.1	<0.1	<0.1	<0.1	0.1	<0.1	<0.1
Ag ppm	0.2	<0.1	0.1	0.2	<0.1	<0.1	0.1	0.1	0.1	<0.1	<0.1	<0.1	<0.1	<0.1	0.2	<0.1	<0.1	<0.1	<0.1	<0.1	<0.1	0.1	0.2	0.1	0.1	0.1	<0.1	<0.1	<0.1	<0.1	<0.1	<0.1	<0.1	<0.1	<0.1	<0.1	<0.1	<0.1	<0.1
Tl ppm	<0.1	<0.1	<0.1	<0.1	0.2	0.1	0.5	<0.1	<0.1	<0.1	0.5	<0.1	0.5	0.1	<0.1	0.7	<0.1	<0.1	<0.1	<0.1	<0.1	<0.1	<0.1	0.2	0.2	<0.1	<0.1	0.1	0.1	<0.1	0.2	0.2	0.1	<0.1	0.2	0.1	<0.1	0.2	<0.1
TOT/C %	0.08	0.04	0.08	0.12	0.13	0.15	0.04	0.35	0.14	0.11	0.05	0.08	0.02	0.07	0.04	0.05	0.05	0.03	0.09	0.06	0.06	0.09	0.1	0.06	0.13	0.08	0.55	0.05	0.38	0.07	0.09	0.05	0.04	0.1	0.03	0.07	0.06	0.06	0.04
TOT/S %	0.76	0.33	0.48	0.75	<0.01	0.02	<0.01	0.02	0.01	0.02	0.03	<0.01	<0.01	0.09	0.16	<0.01	0.19	0.25	0.34	0.24	0.32	0.22	0.06	0.1	0.03	0.14	<0.01	0.09	<0.01	0.14	0.3	0.09	0.01	0.02	<0.01	<0.01	0.27	<0.01	0.15
LOI %	1.5	1.4	1.1	2.8	1.7	2	2.3	5.2	3.6	4	1.3	1.5	0.9	1.7	1.1	1.2	0.5	0.2	1.7	1.8	1.2	1.6	3	0.8	1.1	0.6	3.6	0.8	2.8	1.3	1	3.2	3	1.9	0.8	1.3	1.4	1.2	1.6
Ba ppm	154	134	211	289	813	666	820	366	510	31	565	276	1632	321	177	518	83	37	121	142	129	225	454	818	516	250	306	215	416	210	956	152	163	105	233	317	311	944	268
Ni ppm	28	34	24	35	40	84	24	61	72	61	138	150	32	125	30	<5	26	34	47	92	31	18	125	76	24	27	28	52	26	76	9	211	182	136	89	85	24	31	9
Sc ppm	33	35	33	33	10	18	7	27	28	29	27	26	17	35	40	7	48	49	39	39	45	38	34	18	19	36	9	39	9	25	4	27	23	18	27	23	15	17	30
Sum %	99.83	99.83	99.81	99.8	99.72	99.62	99.72	99.79	99.76	99.85	99.74	99.8	99.61	99.79	99.81	99.81	99.83	99.86	99.82	99.68	99.81	99.72	99.69	99.66	99.73	99.77	99.77	99.8	99.76	99.79	99.7	99.85	99.68	99.7	99.7	99.68	99.69	99.6	99.74
Co ppm	30.6	28.5	22	27.2	14.5	26.3	29.4	36.9	37.7	35.2	38	33.1	24.7	32.5	41.8	9.1	49.8	53.5	39.1	45.6	56.2	47.1	37.7	28.6	21.8	41.1	7.9	32.6	6.1	36.5	7.4	69.8	61.3	54.7	40	40.4	17.2	16.7	26.4
Cs ppm	0.5	1	1.3	1.6	1.3	0.9	2	0.8	0.6	0.9	4.9	0.3	2.8	0.5	2.1	7	4.4	0.8	6.6	5.3	8.5	2	1.8	1.7	1.4	1.6	0.6	1.4	1	1.5	1.2	3.3	3.3	0.2	2.8	2.6	0.7	2.7	1.8
Ga ppm	20.1	17.2	18.8	17.8	19.6	18.5	19.6	21.1	21.9	21.1	20.6	13.3	22.2	14.9	20.5	15.9	19.1	18.4	18.2	18.5	22.4	24.9	18.6	21	21	25	17.7	20.2	17.3	21.3	18.1	15.4	15.3	14.3	21	19.2	19.8	20.5	18.7
Hf ppm	3.6	3.8	3.4	3.2	3.4	5.7	4.2	4	3.5	3.5	3.9	3.7	4.9	3	3.6	3.8	2.4	1.5	2.8	2.8	2.5	6.6	3.1	3.8	2.9	5.2	4	4.6	4	2.7	4.5	2.6	2.4	2	4.6	3.7	6.7	7.4	5.6
Nb ppm	6	5.3	5.4	5.1	6.7	12	9.7	18.8	17.8	16.7	11.6	10.6	15.3	9.1	4.5	6.3	2.8	1.5	4.7	3.9	5.4	12.7	13.5	7.8	7.2	20.7	11.8	18.1	12.3	12	9.7	11.2	10.5	8.9	20.2	23.3	37.3	41.3	14
Rb ppm	6.4	11.9	6.5	7.3	55.3	41.2	57.8	12.2	9.6	1.3	75.4	15.2	112.9	29.2	24.5	147.3	24.7	3.9	19.5	42.3	30.1	25.5	23.3	63.3	50.5	31.3	10.4	30.9	25.8	9.5	51.4	26	33	2.4	23.7	27.7	56.4	134.2	43.5
Sn ppm	3	3	3	3	1	2	2	2	2	2	2	3	3	3	2	2	2	1	2	2	3	3	2	2	2	2	2	2	2	2	1	1	<1	1	1	1	3	2	2
Sr ppm	205.5	187.2	249.2	262	712.8	1107.3	637	366.4	415.1	146.9	526.6	546.2	614.4	537.4	313.5	346	215.1	129.2	281.4	357.4	264.4	339	575.2	961.7	883.5	425.4	736.2	393.9	758.9	662.7	810.8	184.6	369	440	411.5	514.7	998.9	956	444.7
Ta ppm	0.4	0.4	0.3	0.4	0.4	0.6	0.5	1.2	0.9	1.1	0.7	0.7	1	0.6	0.3	0.6	0.2	<0.1	0.4	0.2	0.3	0.9	0.6	0.4	0.7	1	0.7	0.9	0.5	0.8	0.7	0.7	0.6	0.5	1.2	1.2	1.9	2.2	0.9
Th ppm	2.4	2.1	2.1	1.9	11.5	25.8	12.9	4.3	3.5	3.8	10.6	9.6	13.4	7.3	1.8	19.9	1	<0.2	1.6	1.5	2.5	4	8.3	11.3	9.8	5.5	10.7	4.6	11.1	2.9	13.5	3	2.8	2	4.6	6.1	28.9	29.3	5.9
U ppm	0.6	0.7	0.8	0.6	2.1	5.5	3	0.9	0.7	0.7	2.4	2.2	2.8	1.2	0.4	2.4	0.2	<0.1	0.3	0.4	0.8	0.9	1.7	3.3	1.9	1.1	2.2	1.1	3.7	0.6	3.7	0.6	0.5	0.4	1.1	1.3	6.4	6.7	1
V ppm	245	257	243	250	79	151	60	259	258	272	224	208	228	212	297	69	360	327	324	406	366	413	301	145	157	318	89	305	92	201	43	219	189	153	247	188	179	205	221
W ppm	1	0.8	0.8	1.1	<0.5	<0.5	1.1	0.6	<0.5	0.5	1.1	1.1	1.4	1	<0.5	<0.5	<0.5	<0.5	<0.5	<0.5	1.1	0.9	1.1	0.5	<0.5	0.9	0.9	0.9	0.6	0.7	0.7	<0.5	0.5	36.9	0.7	0.8	2	1.2	<0.5
Zr ppm	137.1	139.9	138.7	129.8	134.4	257.3	178.3	166	154.6	150.4	149.3	137.3	199.7	111.2	133.4	139.1	87.4	52.1	110.3	79.1	83.7	276.1	115.7	160.3	104.9	213.1	166.3	173.4	162.2	113.3	189.6	112.3	102.2	81.3	186	163.6	281.3	332.1	253.3
Y ppm	31.4	32.4	30.9	30.3	11.7	31.1	20.1	31.7	27.5	26.7	19.2	19.2	22.9	17.4	32.2	14.7	33.3	28	26.1	30.9	30.7	57.5	18.4	22.3	18.3	41.6	15.2	34.1	16.4	21.9	11.5	21.6	19.3	15	32.2	20.8	19.1	21.4	58.8
La ppm	12.8	13.6	15.8	14.1	36	116.8	47.6	27.2	23	21.9	32.9	28.1	44	25.4	9.9	32.4	5.5	2.6	11	10.6	11	27.2	33.2	53.7	37.1	32.7	53.4	25.9	49.2	18.7	49.8	17.4	15.3	12.2	25.5	31.9	65	72.8	30.7
Ce ppm	28.7	30.8	31	26.6	59.6	221.3	79.5	51	45	44.3	58.5	53.5	81.8	54	25.1	51.1	12.8	6.6	22.8	28.2	21.8	58.2	62.8	99.6	66.3	62.2	82.7	47.5	84.9	34.8	76.6	31.5	31	23.4	49.6	57.8	113.3	127.3	66.8
Pr ppm	4.08	4.21	4.27	3.92	6.79	28.3	8.96	6.52	5.73	5.67	7.33	6.97	9.89	6.51	3.59	5.82	2.1	1.34	3.16	4.55	3.4	8.22	7.17	12.13	7.95	7.92	9.26	6.44	9.49	4.24	7.96	4.07	3.95	2.96	6.52	7.12	13.77	14.61	9.95
Nd ppm	19.3	18.8	18.7	17.9	25.9	109.4	30.9	26.3	22.7	22.7	29.2	25.7	36.5	23.6	17.5	19.8	10.2	8	14.1	21.3	15.5	35.8	27.7	46.7	28.8	34.4	31	28.1	34	16.3	26.6	16.1	16.6	11.9	26.7	27.4	51.1	50.6	47.9
Sm ppm	4.84	4.73	4.66	4.61	4.04	19.42	5.26	5.68	5.52	4.83	5.31	5.35	7.25	4.9	4.63	3.55	3.31	2.76	3.55	5.17	4.44	8.7	4.66	8.57	5.36	7.26	5.15	5.98	4.97	3.78	3.7	3.56	3.83	2.58	5.73	5.2	8.07	8.27	11.83
Eu ppm	1.61	1.54	1.6	1.56	1.17	4.2	1.32	1.91	1.76	1.66	1.32	1.35	1.9	1.34	1.58	0.8	1.41	1.18	1.19	1.53	1.47	2.86	1.4	2.39	1.39	2.42	1.24	2.13	1.53	1.31	1.07	1.26	1.24	1.17	1.83	1.71	1.65	1.85	3.69
Gd ppm	5.58	5.43	5.48	5.07	3.28	13.84	4.2	6.05	5.7	5.03	4.52	4.44	5.33	4.11	5.74	2.99	4.92	3.97	4.35	5.48	5.16	10.34	4.33	7.34	4.5	7.79	4.03	6.89	4.17	3.96	3.09	3.85	3.47	3.04	5.68	4.85	5.49	6.48	12.06
Tb ppm	0.91	1	0.94	0.89	0.44	1.6	0.6	1	0.88	0.85	0.6	0.72	0.79	0.64	0.99	0.5	0.96	0.79	0.79	1	0.94	1.74	0.65	0.88	0.66	1.31	0.59	1.15	0.6	0.72	0.43	0.73	0.64	0.48	0.96	0.72	0.77	0.85	1.83
Dy ppm	5.6	6	5.76	5.17	2.23	7.06	3.19	5.65	5.04	4.88	3.57	3.69	4.12	3.5	5.78	2.61	5.8	5.11	4.35	5.17	5.69	9.6	3.61	4.27	3.72	7.54	2.62	6.24	3.09	4.1	2.15	3.76	3.9	2.8	6.06	4.14	4.19	4.59	11.41
Ho ppm	1.21	1.2	1.2	1.14	0.43	1.11	0.64	1.16	1.01	0.98	0.71	0.74	0.92	0.61	1.3	0.53	1.2	1.13	1.01	1.14	1.32	2.02	0.78	0.79	0.72	1.57	0.53	1.29	0.56	0.83	0.38	0.86	0.78	0.56	1.13	0.76	0.76	0.77	2.28
Er ppm	3.59	3.48	3.52	3.51	1.19	2.64	1.88	3.05	2.95	2.96	2.17	2.12	2.25	1.95	3.76	1.66	3.49	3.44	2.92	3.37	3.93	6.39	1.99	2.05	2	4.47	1.41	4.01	1.56	2.4	1.17	2.37	2.06	1.54	3.24	2.3	2.01	2.16	6.34
Tm ppm	0.48	0.46	0.49	0.48	0.14	0.35	0.27	0.45	0.42	0.35	0.3	0.29	0.35	0.26	0.52	0.24	0.51	0.48	0.38	0.47	0.52	0.89	0.29	0.26	0.29	0.6	0.21	0.55	0.22	0.32	0.2	0.31	0.31	0.22	0.44	0.32	0.3	0.31	0.85
Yb ppm	3.1	2.89	3.02	2.96	1.02	2.08	1.86	2.79	2.63	2.41	1.87	1.71	2.28	1.69	3.24	1.63	3.68	2.85	2.82	3.03	3.56	5.91	1.88	1.85	1.65	4.2	1.59	3.68	1.45	2.16	1.3	2.22	1.88	1.45	2.95	1.91	1.91	2.26	5.31
Lu ppm	0.47	0.48	0.46	0.45	0.16	0.28	0.3	0.43	0.44	0.41	0.28	0.29	0.3	0.24	0.49	0.25	0.58	0.46	0.45	0.46	0.51	0.91	0.29	0.27	0.26	0.65	0.22	0.51	0.22	0.36	0.21	0.32	0.3	0.23	0.47	0.29	0.31	0.32	0.85
